# Supplementary material for: Can High-Intensity Functional Suspension Training over Eight Weeks Improve Resting Blood Pressure and Quality of Life in Young Adults? A Randomized Controlled Trial
Source: Int J Environ Res Public Health. 2019 Dec 12;16(24):5062. doi: 10.3390/ijerph16245062 (PMC6950016; doi:10.3390/ijerph16245062)
Supplement: Supplementary File 1 [file ijerph-16-05062-s001.pdf]

Details of the Functional<sub>HIT</sub> training sessions during the 8-week Functional<sub>HIT</sub> training intervention. Four group training sessions per week were scheduled and offered. Participants had to attend two out of four training sessions per week. Duration of each session was ≈30 minutes. Each exercise was performed with the “Tabata interval protocol 20 seconds loading – 10 seconds resting”.

| Week | Session | Functional <sub>HIT</sub>                                                                                                                                                                                                                                                                                                                                                  |
|------|---------|----------------------------------------------------------------------------------------------------------------------------------------------------------------------------------------------------------------------------------------------------------------------------------------------------------------------------------------------------------------------------|
| 1    | 1       | 3 min warm-up<br>- 8 sets of<br>- 20-s TRX squats + 10-s recovery<br>- 8 sets of<br>- 20-s burpees + 10-s recovery<br>- 8 sets of<br>- 20-s jumping jack + 10-s recovery<br>- 8 sets of<br>- 20-s crunches + 10-s recovery<br>- 8 sets of<br>- 20-s dips + 10-s recovery<br>- 8 sets of<br>- 20-s TRX squats + 10-s recovery<br>3 min cool-down                            |
|      | 2       | 3 min warm-up<br>- 8 sets of<br>- 20-s jumping jack + 10-s recovery<br>- 8 sets of<br>- 20-s TRX chest press + 10-s recovery<br>- 8 sets of<br>- 20-s mountain climbers + 10-s recovery<br>- 8 sets of<br>- 20-s crunches + 10-s recovery<br>- 8 sets of<br>- 20-s stand up, lay down + 10-s recovery<br>- 8 sets of<br>- 20-s dips + 10-s recovery<br>3 min cool-down     |
|      | 3       | 3 min warm-up<br>- 8 sets of<br>- 20-s jumping jack + 10-s recovery<br>- 8 sets of<br>- 20-s TRX chest press + 10-s recovery<br>- 8 sets of<br>- 20-s skippings + 10-s recovery<br>- 8 sets of<br>- 20-s high knees + 10-s recovery<br>- 8 sets of<br>- 20-s mountain climbers + 10-s recovery<br>- 8 sets of<br>- 20-s TRX chest press + 10-s recovery<br>3 min cool-down |
|      | 4       | 3 min warm-up<br>- 8 sets of<br>- 20-s jumping jack + 10-s recovery<br>- 8 sets of                                                                                                                                                                                                                                                                                         |

|   |   |                                                                                                                                                                                                                                                                                                                                                                                                                                                                                                                                                                                                                                                                                                                                                                                                                                                       |
|---|---|-------------------------------------------------------------------------------------------------------------------------------------------------------------------------------------------------------------------------------------------------------------------------------------------------------------------------------------------------------------------------------------------------------------------------------------------------------------------------------------------------------------------------------------------------------------------------------------------------------------------------------------------------------------------------------------------------------------------------------------------------------------------------------------------------------------------------------------------------------|
|   |   | <ul style="list-style-type: none"> <li>- 20-s TRX chest press + 10-s recovery</li> <li>- 8 sets of               <ul style="list-style-type: none"> <li>- 20-s crunches + 10-s recovery</li> </ul> </li> <li>- 8 sets of               <ul style="list-style-type: none"> <li>- 20-s push-ups + 10-s recovery</li> </ul> </li> <li>- 8 sets of               <ul style="list-style-type: none"> <li>- 20-s jumping jack + 10-s recovery</li> </ul> </li> <li>- 8 sets of               <ul style="list-style-type: none"> <li>- 20-s lunges + 15-s recovery</li> </ul> </li> </ul> <p>3 min cool-down</p>                                                                                                                                                                                                                                             |
|   | 1 | <p>3 min warm-up</p> <ul style="list-style-type: none"> <li>- 8 sets of               <ul style="list-style-type: none"> <li>- 20-s jumping jack + 10-s recovery</li> </ul> </li> <li>- 8 sets of               <ul style="list-style-type: none"> <li>- 20-s burpees + 10-s recovery</li> </ul> </li> <li>- 8 sets of               <ul style="list-style-type: none"> <li>- 20-s mountain climbers + 10-s recovery</li> </ul> </li> <li>- 8 sets of               <ul style="list-style-type: none"> <li>- 20-s lunges + 10-s recovery</li> </ul> </li> <li>- 8 sets of               <ul style="list-style-type: none"> <li>- 20-s high knees + 10-s recovery</li> </ul> </li> <li>- 8 sets of               <ul style="list-style-type: none"> <li>- 20-s crunches + 10-s recovery</li> </ul> </li> </ul> <p>3 min cool-down</p>                  |
| 2 | 2 | <p>3 min warm-up</p> <ul style="list-style-type: none"> <li>- 8 sets of               <ul style="list-style-type: none"> <li>- 20-s jumping jack + 10-s recovery</li> </ul> </li> <li>- 8 sets of               <ul style="list-style-type: none"> <li>- 20-s TRX chest press + 10-s recovery</li> </ul> </li> <li>- 8 sets of               <ul style="list-style-type: none"> <li>- 20-s stand up, lay down + 10-s recovery</li> </ul> </li> <li>- 8 sets of               <ul style="list-style-type: none"> <li>- TRX squats and row + 10-s recovery</li> </ul> </li> <li>- 8 sets of               <ul style="list-style-type: none"> <li>- 20-s high knees + 10-s recovery</li> </ul> </li> <li>- 8 sets of               <ul style="list-style-type: none"> <li>- 20-s push-ups + 10-s recovery</li> </ul> </li> </ul> <p>3 min cool-down</p>  |
|   | 3 | <p>3 min warm-up</p> <ul style="list-style-type: none"> <li>- 8 sets of               <ul style="list-style-type: none"> <li>- 20-s TRX chest press + 10-s recovery</li> </ul> </li> <li>- 8 sets of               <ul style="list-style-type: none"> <li>- 20-s TRX squats + 10-s recovery</li> </ul> </li> <li>- 8 sets of               <ul style="list-style-type: none"> <li>- 20-s mountain climbers + 10-s recovery</li> </ul> </li> <li>- 8 sets of               <ul style="list-style-type: none"> <li>- 20-s skippings + 10-s recovery</li> </ul> </li> <li>- 8 sets of               <ul style="list-style-type: none"> <li>- 20-s crunches + 10-s recovery</li> </ul> </li> <li>- 8 sets of               <ul style="list-style-type: none"> <li>- 20-s stand up, lay down + 10-s recovery</li> </ul> </li> </ul> <p>3 min cool-down</p> |
|   | 4 | <p>3 min warm-up</p> <ul style="list-style-type: none"> <li>- 8 sets of               <ul style="list-style-type: none"> <li>- 20-s mountain climbers + 10-s recovery</li> </ul> </li> </ul>                                                                                                                                                                                                                                                                                                                                                                                                                                                                                                                                                                                                                                                          |

|   |   |                                                                                                                                                                                                                                                                                                                                                                                                                                                                                                                                                                                                                                                                                                                                                                                                                                                      |
|---|---|------------------------------------------------------------------------------------------------------------------------------------------------------------------------------------------------------------------------------------------------------------------------------------------------------------------------------------------------------------------------------------------------------------------------------------------------------------------------------------------------------------------------------------------------------------------------------------------------------------------------------------------------------------------------------------------------------------------------------------------------------------------------------------------------------------------------------------------------------|
|   |   | <ul style="list-style-type: none"> <li>- 8 sets of               <ul style="list-style-type: none"> <li>- 20-s TRX chest press + 10-s recovery</li> </ul> </li> <li>- 8 sets of               <ul style="list-style-type: none"> <li>- 20-s skippings + 10-s recovery</li> </ul> </li> <li>- 8 sets of               <ul style="list-style-type: none"> <li>- 20-s burpees + 10-s recovery</li> </ul> </li> <li>- 8 sets of               <ul style="list-style-type: none"> <li>- 20-s crunches + 10-s recovery</li> </ul> </li> <li>- 8 sets of               <ul style="list-style-type: none"> <li>- 20-s TRX squats + 10-s recovery</li> </ul> </li> </ul> <p>3 min cool-down</p>                                                                                                                                                               |
|   | 1 | <p>3 min warm-up</p> <ul style="list-style-type: none"> <li>- 8 sets of               <ul style="list-style-type: none"> <li>- 20-s high knees + 10-s recovery</li> </ul> </li> <li>- 8 sets of               <ul style="list-style-type: none"> <li>- 20-s TRX chest press + 10-s recovery</li> </ul> </li> <li>- 8 sets of               <ul style="list-style-type: none"> <li>- 20-s TRX squats + 10-s recovery</li> </ul> </li> <li>- 8 sets of               <ul style="list-style-type: none"> <li>- 20-s crunches + 10-s recovery</li> </ul> </li> <li>- 8 sets of               <ul style="list-style-type: none"> <li>- 20-s stand up, lay down + 10-s recovery</li> </ul> </li> <li>- 8 sets of               <ul style="list-style-type: none"> <li>- 20-s push-ups + 10-s recovery</li> </ul> </li> </ul> <p>3 min cool-down</p>        |
| 3 | 2 | <p>3 min warm-up</p> <ul style="list-style-type: none"> <li>- 8 sets of               <ul style="list-style-type: none"> <li>- 20-s jumping jack + 10-s recovery</li> </ul> </li> <li>- 8 sets of               <ul style="list-style-type: none"> <li>- 20-s TRX chest press + 10-s recovery</li> </ul> </li> <li>- 8 sets of               <ul style="list-style-type: none"> <li>- 20-s stand up, lay down + 10-s recovery</li> </ul> </li> <li>- 8 sets of               <ul style="list-style-type: none"> <li>- TRX squats and row + 10-s recovery</li> </ul> </li> <li>- 8 sets of               <ul style="list-style-type: none"> <li>- 20-s high knees + 10-s recovery</li> </ul> </li> <li>- 8 sets of               <ul style="list-style-type: none"> <li>- 20-s push-ups + 10-s recovery</li> </ul> </li> </ul> <p>3 min cool-down</p> |
|   | 3 | <p>3 min warm-up</p> <ul style="list-style-type: none"> <li>- 8 sets of               <ul style="list-style-type: none"> <li>- 20-s TRX squats + 10-s recovery</li> </ul> </li> <li>- 8 sets of               <ul style="list-style-type: none"> <li>- 20-s burpees + 10-s recovery</li> </ul> </li> <li>- 8 sets of               <ul style="list-style-type: none"> <li>- 20-s jumping jack + 10-s recovery</li> </ul> </li> <li>- 8 sets of               <ul style="list-style-type: none"> <li>- 20-s crunches + 10-s recovery</li> </ul> </li> <li>- 8 sets of               <ul style="list-style-type: none"> <li>- 20-s high knees + 10-s recovery</li> </ul> </li> <li>- 8 sets of               <ul style="list-style-type: none"> <li>- 20-s TRX squats + 10-s recovery</li> </ul> </li> </ul> <p>3 min cool-down</p>                    |
|   | 4 | <p>3 min warm-up</p> <ul style="list-style-type: none"> <li>- 8 sets of</li> </ul>                                                                                                                                                                                                                                                                                                                                                                                                                                                                                                                                                                                                                                                                                                                                                                   |

|   |   |                                                                                                                                                                                                                                                                                                                                                                                                                                                                                                                                                                                                                                                                                                                                                                                                                                                 |
|---|---|-------------------------------------------------------------------------------------------------------------------------------------------------------------------------------------------------------------------------------------------------------------------------------------------------------------------------------------------------------------------------------------------------------------------------------------------------------------------------------------------------------------------------------------------------------------------------------------------------------------------------------------------------------------------------------------------------------------------------------------------------------------------------------------------------------------------------------------------------|
|   |   | <ul style="list-style-type: none"> <li>- 20-s jumping jack + 10-s recovery</li> <li>- 8 sets of               <ul style="list-style-type: none"> <li>- 20-s burpees + 10-s recovery</li> </ul> </li> <li>- 8 sets of               <ul style="list-style-type: none"> <li>- 20-s mountain climbers + 10-s recovery</li> </ul> </li> <li>- 8 sets of               <ul style="list-style-type: none"> <li>- 20-s lunges + 10-s recovery</li> </ul> </li> <li>- 8 sets of               <ul style="list-style-type: none"> <li>- 20-s high knees + 10-s recovery</li> </ul> </li> <li>- 8 sets of               <ul style="list-style-type: none"> <li>- 20-s crunches + 10-s recovery</li> </ul> </li> <li>3 min cool-down</li> </ul>                                                                                                            |
|   | 1 | 3 min warm-up <ul style="list-style-type: none"> <li>- 8 sets of               <ul style="list-style-type: none"> <li>- 20-s TRX squats + 10-s recovery</li> </ul> </li> <li>- 8 sets of               <ul style="list-style-type: none"> <li>- 20-s burpees + 10-s recovery</li> </ul> </li> <li>- 8 sets of               <ul style="list-style-type: none"> <li>- 20-s stand up, lay down + 10-s recovery</li> </ul> </li> <li>- 8 sets of               <ul style="list-style-type: none"> <li>- 20-s lunges + 10-s recovery</li> </ul> </li> <li>- 8 sets of               <ul style="list-style-type: none"> <li>- 20-s high knees + 10-s recovery</li> </ul> </li> <li>- 8 sets of               <ul style="list-style-type: none"> <li>- 20-s TRX squats and row + 10-s recovery</li> </ul> </li> <li>3 min cool-down</li> </ul>        |
| 4 | 2 | 3 min warm-up <ul style="list-style-type: none"> <li>- 8 sets of               <ul style="list-style-type: none"> <li>- 20-s jumping jack + 10-s recovery</li> </ul> </li> <li>- 8 sets of               <ul style="list-style-type: none"> <li>- 20-s TRX chest press + 10-s recovery</li> </ul> </li> <li>- 8 sets of               <ul style="list-style-type: none"> <li>- 20-s stand up, lay down + 10-s recovery</li> </ul> </li> <li>- 8 sets of               <ul style="list-style-type: none"> <li>- TRX squats and row + 10-s recovery</li> </ul> </li> <li>- 8 sets of               <ul style="list-style-type: none"> <li>- 20-s high knees + 10-s recovery</li> </ul> </li> <li>- 8 sets of               <ul style="list-style-type: none"> <li>- 20-s push-ups + 10-s recovery</li> </ul> </li> <li>3 min cool-down</li> </ul> |
|   | 3 | 3 min warm-up <ul style="list-style-type: none"> <li>- 8 sets of               <ul style="list-style-type: none"> <li>- 20-s jumping jack + 10-s recovery</li> </ul> </li> <li>- 8 sets of               <ul style="list-style-type: none"> <li>- 20-s burpees + 10-s recovery</li> </ul> </li> <li>- 8 sets of               <ul style="list-style-type: none"> <li>- 20-s stand up, lay down + 10-s recovery</li> </ul> </li> <li>- 8 sets of               <ul style="list-style-type: none"> <li>- crunches + 10-s recovery</li> </ul> </li> <li>- 8 sets of               <ul style="list-style-type: none"> <li>- 20-s push-ups + 10-s recovery</li> </ul> </li> <li>- 8 sets of               <ul style="list-style-type: none"> <li>- 20-s lunges + 10-s recovery</li> </ul> </li> <li>3 min cool-down</li> </ul>                       |
|   | 4 | 3 min warm-up                                                                                                                                                                                                                                                                                                                                                                                                                                                                                                                                                                                                                                                                                                                                                                                                                                   |

|   |   |                                                                                                                                                                                                                                                                                                                                                                                                                                                                                                                                                                                                                                                                                                                                                                                                                                            |
|---|---|--------------------------------------------------------------------------------------------------------------------------------------------------------------------------------------------------------------------------------------------------------------------------------------------------------------------------------------------------------------------------------------------------------------------------------------------------------------------------------------------------------------------------------------------------------------------------------------------------------------------------------------------------------------------------------------------------------------------------------------------------------------------------------------------------------------------------------------------|
|   |   | <ul style="list-style-type: none"> <li>- 8 sets of               <ul style="list-style-type: none"> <li>- 20-s mountain climbers + 10-s recovery</li> </ul> </li> <li>- 8 sets of               <ul style="list-style-type: none"> <li>- 20-s TRX chest press + 10-s recovery</li> </ul> </li> <li>- 8 sets of               <ul style="list-style-type: none"> <li>- 20-s skippings + 10-s recovery</li> </ul> </li> <li>- 8 sets of               <ul style="list-style-type: none"> <li>- 20-s push-ups + 10-s recovery</li> </ul> </li> <li>- 8 sets of               <ul style="list-style-type: none"> <li>- 20-s high knees + 10-s recovery</li> </ul> </li> <li>- 8 sets of               <ul style="list-style-type: none"> <li>- 20-s TRX squats + 10-s recovery</li> </ul> </li> <li>3 min cool-down</li> </ul>                 |
|   | 1 | 3 min warm-up<br><ul style="list-style-type: none"> <li>- 8 sets of               <ul style="list-style-type: none"> <li>- 20-s jumping jack + 10-s recovery</li> </ul> </li> <li>- 8 sets of               <ul style="list-style-type: none"> <li>- 20-s burpees + 10-s recovery</li> </ul> </li> <li>- 8 sets of               <ul style="list-style-type: none"> <li>- 20-s mountain climbers + 10-s recovery</li> </ul> </li> <li>- 8 sets of               <ul style="list-style-type: none"> <li>- 20-s lunges + 10-s recovery</li> </ul> </li> <li>- 8 sets of               <ul style="list-style-type: none"> <li>- 20-s high knees + 10-s recovery</li> </ul> </li> <li>- 8 sets of               <ul style="list-style-type: none"> <li>- 20-s crunches + 10-s recovery</li> </ul> </li> </ul> 3 min cool-down                  |
| 5 | 2 | 3 min warm-up<br><ul style="list-style-type: none"> <li>- 8 sets of               <ul style="list-style-type: none"> <li>- 20-s jumping jack + 10-s recovery</li> </ul> </li> <li>- 8 sets of               <ul style="list-style-type: none"> <li>- 20-s TRX chest press + 10-s recovery</li> </ul> </li> <li>- 8 sets of               <ul style="list-style-type: none"> <li>- 20-s stand up, lay down + 10-s recovery</li> </ul> </li> <li>- 8 sets of               <ul style="list-style-type: none"> <li>- TRX squats and row + 10-s recovery</li> </ul> </li> <li>- 8 sets of               <ul style="list-style-type: none"> <li>- 20-s high knees + 10-s recovery</li> </ul> </li> <li>- 8 sets of               <ul style="list-style-type: none"> <li>- 20-s push-ups + 10-s recovery</li> </ul> </li> </ul> 3 min cool-down  |
|   | 3 | 3 min warm-up<br><ul style="list-style-type: none"> <li>- 8 sets of               <ul style="list-style-type: none"> <li>- 20-s TRX chest press + 10-s recovery</li> </ul> </li> <li>- 8 sets of               <ul style="list-style-type: none"> <li>- 20-s TRX squats + 10-s recovery</li> </ul> </li> <li>- 8 sets of               <ul style="list-style-type: none"> <li>- 20-s mountain climbers + 10-s recovery</li> </ul> </li> <li>- 8 sets of               <ul style="list-style-type: none"> <li>- 20-s skippings + 10-s recovery</li> </ul> </li> <li>- 8 sets of               <ul style="list-style-type: none"> <li>- 20-s crunches + 10-s recovery</li> </ul> </li> <li>- 8 sets of               <ul style="list-style-type: none"> <li>- 20-s stand up, lay down + 10-s recovery</li> </ul> </li> </ul> 3 min cool-down |

|  |   |                                                                                                                                                                                                                                                                                                                                                                          |
|--|---|--------------------------------------------------------------------------------------------------------------------------------------------------------------------------------------------------------------------------------------------------------------------------------------------------------------------------------------------------------------------------|
|  | 4 | 3 min warm-up<br>- 8 sets of<br>- 20-s mountain climbers + 10-s recovery<br>- 8 sets of<br>- 20-s TRX chest press + 10-s recovery<br>- 8 sets of<br>- 20-s skippings + 10-s recovery<br>- 8 sets of<br>- 20-s burpees + 10-s recovery<br>- 8 sets of<br>- 20-s crunches + 10-s recovery<br>- 8 sets of<br>- 20-s TRX squats + 10-s recovery<br>3 min cool-down           |
|  |   | 3 min warm-up<br>- 8 sets of<br>- 20-s TRX squats + 10-s recovery<br>- 8 sets of<br>- 20-s burpees + 10-s recovery<br>- 8 sets of<br>- 20-s stand up, lay down + 10-s recovery<br>- 8 sets of<br>- 20-s lunges + 10-s recovery<br>- 8 sets of<br>- 20-s high knees + 10-s recovery<br>- 8 sets of<br>- 20-s TRX squats and row + 10-s recovery<br>3 min cool-down        |
|  | 6 | 3 min warm-up<br>- 8 sets of<br>- 20-s jumping jack + 10-s recovery<br>- 8 sets of<br>- 20-s TRX chest press + 10-s recovery<br>- 8 sets of<br>- 20-s stand up, lay down + 10-s recovery<br>- 8 sets of<br>- TRX squats and row + 10-s recovery<br>- 8 sets of<br>- 20-s high knees + 10-s recovery<br>- 8 sets of<br>- 20-s push-ups + 10-s recovery<br>3 min cool-down |
|  |   | 3 min warm-up<br>- 8 sets of<br>- 20-s jumping jack + 10-s recovery<br>- 8 sets of<br>- 20-s burpees + 10-s recovery<br>- 8 sets of<br>- 20-s stand up, lay down + 10-s recovery<br>- 8 sets of<br>- crunches + 10-s recovery<br>- 8 sets of<br>- 20-s push-ups + 10-s recovery<br>- 8 sets of<br>- 20-s lunges + 10-s recovery                                          |

|                 |                                           |
|-----------------|-------------------------------------------|
| 3 min cool-down |                                           |
| 4               | 3 min warm-up                             |
|                 | - 8 sets of                               |
|                 | - 20-s mountain climbers + 10-s recovery  |
|                 | - 8 sets of                               |
|                 | - 20-s TRX chest press + 10-s recovery    |
|                 | - 8 sets of                               |
|                 | - 20-s skippings + 10-s recovery          |
|                 | - 8 sets of                               |
|                 | - 20-s push-ups + 10-s recovery           |
|                 | - 8 sets of                               |
| 1               | - 20-s high knees + 10-s recovery         |
|                 | - 8 sets of                               |
|                 | - 20-s TRX squats + 10-s recovery         |
|                 | 3 min cool-down                           |
|                 | 3 min warm-up                             |
|                 | - 8 sets of                               |
|                 | - 20-s TRX squats + 10-s recovery         |
|                 | - 8 sets of                               |
|                 | - 20-s burpees + 10-s recovery            |
|                 | - 8 sets of                               |
|                 | - 20-s jumping jack + 10-s recovery       |
| 7               | - 8 sets of                               |
|                 | - 20-s crunches + 10-s recovery           |
|                 | - 8 sets of                               |
|                 | - 20-s dips + 10-s recovery               |
|                 | - 8 sets of                               |
|                 | - 20-s TRX squats + 10-s recovery         |
|                 | 3 min cool-down                           |
|                 | 3 min warm-up                             |
|                 | - 8 sets of                               |
|                 | - 20-s jumping jack + 10-s recovery       |
| 2               | - 8 sets of                               |
|                 | - 20-s TRX chest press + 10-s recovery    |
|                 | - 8 sets of                               |
|                 | - 20-s mountain climbers + 10-s recovery  |
|                 | - 8 sets of                               |
|                 | - 20-s crunches + 10-s recovery           |
|                 | - 8 sets of                               |
|                 | - 20-s stand up, lay down + 10-s recovery |
|                 | - 8 sets of                               |
|                 | - 20-s dips + 10-s recovery               |
| 3               | 3 min cool-down                           |
|                 | 3 min warm-up                             |
|                 | - 8 sets of                               |
|                 | - 20-s jumping jack + 10-s recovery       |
|                 | - 8 sets of                               |
|                 | - 20-s TRX chest press + 10-s recovery    |
|                 | - 8 sets of                               |
|                 | - 20-s skippings + 10-s recovery          |
|                 | - 8 sets of                               |
|                 | - 20-s high knees + 10-s recovery         |
|                 | - 8 sets of                               |
|                 | - 20-s mountain climbers + 10-s recovery  |
|                 | - 8 sets of                               |

|   |  |                                           |
|---|--|-------------------------------------------|
|   |  | - 20-s TRX chest press + 10-s recovery    |
|   |  | 3 min cool-down                           |
|   |  | 3 min warm-up                             |
|   |  | - 8 sets of                               |
|   |  | - 20-s jumping jack + 10-s recovery       |
|   |  | - 8 sets of                               |
|   |  | - 20-s TRX chest press + 10-s recovery    |
|   |  | - 8 sets of                               |
|   |  | - 20-s crunches + 10-s recovery           |
| 4 |  | - 8 sets of                               |
|   |  | - 20-s push-ups + 10-s recovery           |
|   |  | - 8 sets of                               |
|   |  | - 20-s jumping jack + 10-s recovery       |
|   |  | - 8 sets of                               |
|   |  | - 20-s lunges + 15-s recovery             |
|   |  | 3 min cool-down                           |
|   |  | 3 min warm-up                             |
|   |  | - 8 sets of                               |
|   |  | - 20-s jumping jack + 10-s recovery       |
|   |  | - 8 sets of                               |
|   |  | - 20-s burpees + 10-s recovery            |
|   |  | - 8 sets of                               |
|   |  | - 20-s mountain climbers + 10-s recovery  |
| 1 |  | - 8 sets of                               |
|   |  | - 20-s lunges + 10-s recovery             |
|   |  | - 8 sets of                               |
|   |  | - 20-s high knees + 10-s recovery         |
|   |  | - 8 sets of                               |
|   |  | - 20-s crunches + 10-s recovery           |
|   |  | 3 min cool-down                           |
|   |  | 3 min warm-up                             |
|   |  | - 8 sets of                               |
|   |  | - 20-s jumping jack + 10-s recovery       |
| 8 |  | - 8 sets of                               |
|   |  | - 20-s TRX chest press + 10-s recovery    |
|   |  | - 8 sets of                               |
|   |  | - 20-s stand up, lay down + 10-s recovery |
| 2 |  | - 8 sets of                               |
|   |  | - TRX squats and row + 10-s recovery      |
|   |  | - 8 sets of                               |
|   |  | - 20-s high knees + 10-s recovery         |
|   |  | - 8 sets of                               |
|   |  | - 20-s push-ups + 10-s recovery           |
|   |  | 3 min cool-down                           |
|   |  | 3 min warm-up                             |
|   |  | - 8 sets of                               |
|   |  | - 20-s TRX chest press + 10-s recovery    |
|   |  | - 8 sets of                               |
|   |  | - 20-s TRX squats + 10-s recovery         |
| 3 |  | - 8 sets of                               |
|   |  | - 20-s mountain climbers + 10-s recovery  |
|   |  | - 8 sets of                               |
|   |  | - 20-s skippings + 10-s recovery          |
|   |  | - 8 sets of                               |

- 
- 20-s crunches + 10-s recovery
  - 8 sets of
    - 20-s stand up, lay down + 10-s recovery
- 3 min cool-down
- 

4

- 3 min warm-up
- 8 sets of
    - 20-s mountain climbers + 10-s recovery
  - 8 sets of
    - 20-s TRX chest press + 10-s recovery
  - 8 sets of
    - 20-s skippings + 10-s recovery
  - 8 sets of
    - 20-s burpees + 10-s recovery
  - 8 sets of
    - 20-s crunches + 10-s recovery
  - 8 sets of
    - 20-s TRX squats + 10-s recovery
- 3 min cool-down
-
